# Supplementary material for: High-Frequency Hearing Loss Is Associated With Anxiety and Brain Structural Plasticity in Older Adults
Source: PubMed Central journal article supplement (PMC8961435; doi:10.3389/fnagi.2022.821537), 2022-03-10
Supplement: Table_1.pdf [file Table_1.pdf]

## *Supplementary Material*

# High-frequency Hearing Loss is Associated with Anxiety and Brain Structural Plasticity in Older Adults

**Supplementary Table 1** Component score of the rotated coefficient matrix.

| Frequency (kHz) | Component 1 | Component 2 |
|-----------------|-------------|-------------|
| 0.125           | 0.406       | -0.212      |
| 0.25            | 0.409       | -0.191      |
| 0.5             | 0.328       | -0.094      |
| 1               | 0.176       | 0.066       |
| 2               | -0.056      | 0.326       |
| 4               | -0.257      | 0.525       |
| 8               | -0.173      | 0.433       |

Common factor 1 and common factor 2 are common factors extracted by factor analysis. This value represents the component score corresponding to each frequency variable.
